# Supplementary material for: Prevalence and incidence of nodding syndrome and other forms of epilepsy in onchocerciasis-endemic areas in northern Uganda after the implementation of onchocerciasis control measures
Source: PubMed Central journal article supplement (PMC7050130; doi:10.1186/s40249-020-0628-3), 2020-03-02
Supplement: 40249_2020_628_MOESM1_ESM.pdf [file 40249_2020_628_MOESM1_ESM.pdf]

**ADDITIONAL FILE 1**

**2012 Village Health Team (VHT) nodding syndrome case report form**

**Date:** .....**District:** ..... **Sub-county:**.....

**Parish:** ..... **Village:** .....

**Name of LCI Chair:** ..... **Phone:** .....

**Name of Household head:** .....

**Phone number of Household head:** .....

| Serial No. | Name of patient | Age [Yrs] | Sex [M/ F] | Type of Disease (Yes or No)  |                   | Date of onset (month/ yr) | Case Status Alive [A]; or Dead [D] |
|------------|-----------------|-----------|------------|------------------------------|-------------------|---------------------------|------------------------------------|
|            |                 |           |            | Nodding Syndrome ("Luc luc") | Epilepsy ("Lili") |                           |                                    |
|            |                 |           |            |                              |                   |                           |                                    |
|            |                 |           |            |                              |                   |                           |                                    |
|            |                 |           |            |                              |                   |                           |                                    |
|            |                 |           |            |                              |                   |                           |                                    |
|            |                 |           |            |                              |                   |                           |                                    |
|            |                 |           |            |                              |                   |                           |                                    |
|            |                 |           |            |                              |                   |                           |                                    |
|            |                 |           |            |                              |                   |                           |                                    |

**Village:** .....

**Name of VHT** ..... **Phone:** .....

**Signature:** .....

*Use one form per household. Start by listing the nodding syndrome and/ or epilepsy cases that are alive. Then inquire and list all household members who had either nodding syndrome and/ or epilepsy but are dead.*

## 2017 survey: Household level questionnaire

*NOTE: This questionnaire will be administered in a digitalized form on a tablet computer that will be used as a data collection tool during this survey. Within each household, all participants will be asked all the questions in sections 1.2 and 1.3 during one single interview sequence.*

DATE: \_\_\_\_\_ / \_\_\_\_\_ / \_\_\_\_\_

FULL NAME OF INTERVIEWER:

\_\_\_\_\_

DISTRICT:

\_\_\_\_\_

PARISH:

\_\_\_\_\_

VILLAGE:

### 1.1. HOUSEHOLD CHARACTERISTICS

UNIQUE HOUSEHOLD CODE:

XX / XX / XX/XXXX (First 2 letters of: District/Parish/Village, followed by number (e.g.0001))

GPS coordinates of household:

LATITUDE \_\_ \_\_. \_\_ \_\_ \_\_ \_\_ LONGITUDE \_\_ \_\_. \_\_ \_\_ \_\_ \_\_ ALTITUDE \_\_ \_\_ \_\_

Full name of household head:

\_\_\_\_\_

Mobile phone number of household head:

\_\_\_\_\_

Ethnic group of household head:

\_\_\_\_\_

Total number of people in the household:

Livelihood generating activities of the family:  Farmer  Livestock  
breeder  Fisherman   
Civil service  Business / trader  Craftsman  
 other,  
specify: \_\_\_\_\_

Has there been a family member that died from any form of epilepsy or nodding syndrome, lili or luc luc?

YES  NO  DON'T KNOW

IF YES: When (year) \_\_\_\_\_ At what age: \_\_\_\_\_  
years  
IF MORE THAN ONE: When (year) \_\_\_\_\_ At what age: \_\_\_\_\_ years  
When (year) \_\_\_\_\_ At what age: \_\_\_\_\_ years

Did the family or any family member(s) participate in the 2012 and / or 2013 survey on NS?  
 YES  NO  DON'T KNOW

## 1.2. INDIVIDUAL INTERVIEW WITH EACH HOUSEHOLD MEMBER

Person ID:

Full Name:

Age: \_\_\_\_\_ years  
Birth date: \_\_\_\_/\_\_\_\_/\_\_\_\_  
Sex:  Male  Female

Is the person present during the interview visit?  YES  NO  
Who is answering to the questions?  self  mother  household head  
 other, specify

## 1.3. SCREENING FOR EPILEPSY AND NODDING SYNDROME CASES

*If at least one of the 8 questions is answered with YES, the electronic questionnaire will automatically report the person for invitation to participate in the neurological survey for case verification.*

### QUESTION A.

Is the participant / are you suffering from luc luc (nodding syndrome)?

YES  NO  DON'T KNOW

### QUESTION B.

Is the participant / are you suffering from Lili (epilepsy)?

YES  NO  DON'T KNOW

### QUESTION C.

Is the person known to suffer from both, luc luc (nodding syndrome) and Lili (epilepsy)?

YES  NO  DON'T KNOW

**QUESTION 1.**

Have you ever suddenly fallen to the ground and experienced:

- a) Loss of consciousness             YES  NO  DON'T KNOW
- b) Loss of bladder control?         YES  NO  DON'T KNOW
- c) Foam at the mouth?                YES  NO  DON'T KNOW

**QUESTION 2.**

Have you ever experienced absence(s) or sudden loss(es) of contact with the surroundings, for a short duration of time?

YES  NO  DON'T KNOW

**QUESTION 3.**

Have you ever experienced sudden, uncontrollable twitching or shaking of your arms, legs or head, for a period of a few minutes?

YES  NO  DON'T KNOW

**QUESTION 4.**

Do you sometimes experience sudden and brief bodily sensations, see or hear things that are not there, or smell strange odours?

YES  NO  DON'T KNOW

**QUESTION 5.**

Have you ever been told that you are suffering from epilepsy or have you already experienced **at least one episode of seizures**?

YES  NO  DON'T KNOW

**1.3. IVERMECTIN USE**

Did you take ivermectin during the last distribution in 2016?  YES  NO  DON'T KNOW

Signature of Interviewer \_\_\_\_\_

## 2017 survey: Individual Neurology questionnaire

DATE: \_\_\_\_\_ / \_\_\_\_\_ / \_\_\_\_\_

FULL NAME OF THE INTERVIEWER: \_\_\_\_\_

### PARTICIPANT IDENTIFICATION

Participant ID \_\_\_\_\_

Last name (*in capital letters*): \_\_\_\_\_

First name: \_\_\_\_\_

*The medical doctor/neurologist will first assess whether the person referred to him has epilepsy (Nodding syndrome or another form of epilepsy)*

*Diagnosis of Nodding syndrome or another form of epilepsy is confirmed*

YES  NO

If NO: other diagnosis?

- Recurrent febrile convulsions
- Dizziness / syncope
- Paroxysmal vertigo
- Severe anaemia
- Mental retardation without epilepsy
- Psychiatric illness without epilepsy
- Classic migraine
- Other, specify \_\_\_\_\_

*If YES the following neurology questionnaire will be administered in a digitalized form using tablet computers. By indicating the individual Participant ID on paper forms, the neurologist can provide additional important notes of the anamnesis on paper.*

### PARTICIPANT IDENTIFICATION

Participant ID : \_\_\_\_\_

Last name (*in capital letters*): \_\_\_\_\_

First name: \_\_\_\_\_

Town / Village: \_\_\_\_\_

District: \_\_\_\_\_

Phone number: \_\_\_\_\_

Sex:  Male  Female

Age: \_\_\_\_\_

Date of birth: \_\_\_\_/\_\_\_\_/\_\_\_\_\_

Place of birth: \_\_\_\_\_

Country of birth: \_\_\_\_\_

Ethnic group: \_\_\_\_\_

Marital status:  Married  Living with parents  In partnership  
 Living alone  Other, specify \_\_\_\_\_

Is the participant answering himself / herself?  YES  NO

If NO, who is answering and what is the relationship between the participant and respondent?

Full name: \_\_\_\_\_

Relation to participant:  Mother  Father  Sibling  Other, specify \_\_\_\_\_

### DEMOGRAPHIC DATA

Since how long is the participant lives in the village? \_\_\_\_\_ YEARS

IF less than 1 year: how many MONTHS? \_\_\_\_

Was the interviewed participant living in the village in 2011-12?

Yes  No  DON'T KNOW

IF NO, in which village has the participant lived before?

Village: \_\_\_\_\_

Area: \_\_\_\_\_

Health zone: \_\_\_\_\_

IF in a foreign country: in which country has the participant lived before? \_\_\_\_\_

Are you currently attending school?  YES  NO

School grade level completed:  None

Primary  P1  P2  P3  P4  P5  P6  P7

Secondary  S1  S2  W3  S4  S5  S6

Tertiary  University  Vocational/ college / Institute

IF NO: At which level did you stop school attendance: \_\_\_\_\_

Reason:  Due to epileptic seizures while in school  
 Fear to leave the epileptic child unattended  
 Due to epilepsy related stigma  
 Due to epilepsy related learning difficulties  
 Other reasons (financial, other illness than epilepsy, accessibility,)  
 DON'T KNOW

ADULT participant:

Occupation / livelihood activity:  Domestic worker  Farmer  Livestock breeder  
 Fisherman  Civil servant  Craftsman

Student  Business / trader  none  other, specify: \_\_\_\_\_

**CHILD Participants:**

Livelihood activity of family:  Domestic worker  Farmer  Livestock breeder

Fisherman  Civil servant  Craftsman  Student  Business / trader  None  
 other, specify: \_\_\_\_\_

**HISTORY OF EPILEPSY AND HEAD NODDING**

***Nodding History***

Does the participant have a history of head nodding (repetitive involuntary drops of the head towards the chest on 2 or more occasions):  YES  NO

IF YES: Year of onset \_\_\_\_\_

IF YES:

Was the diagnosis of nodding syndrome made by a doctor?  YES  NO  DON'T KNOW

What is the mental status during the head nodding?

- Awake and still able to respond
- Awake but not responding
- Decreased consciousness, not responding
- Unconscious

How old (years) was the child when the head nodding started? \_\_\_\_\_ years

What triggers the head nodding? (Tick which ever applies)

- Spontaneous (no obvious trigger)
- Food  Cold weather
- Nothing  DON'T KNOW
- Other, specify \_\_\_\_\_

Has head nodding continued until today?  Yes  No

IF YES:

What was the frequency of head nodding attacks in the last three months: (Tick highest appropriate frequency):

- less than 1 episode per week
  - 1 or more episodes per week
  - At least 1 episode per day
- (Approximate number: \_\_\_\_\_/day)

Is the participant currently on treatment for nodding syndrome?  Yes  No

IF YES: specify treatment: \_\_\_\_\_

If yes, where does the participant go for treatment?

- Designated treatment center (Name \_\_\_\_\_)
- NS outreach post
- Other, specify \_\_\_\_\_

IF the nodding stopped:

At what age the nodding stopped? \_\_\_\_\_ Years

If the nodding stopped: does the patient now presents another form of epilepsy?

YES  NO

If YES: complete the following questions

***Other forms of seizures***

Has the participant had a seizure in the last 5 years?

YES  NO  DON'T KNOW

What is the number of seizures since onset?

One attack  Two or more seizures

If only two seizures, were they more than 24h apart?  YES  NO  DON'T KNOW

Aura / sensation (hearing, seeing, tasting, smelling, feeling) before seizures:

YES  NO  DON'T KNOW

Episodes of loss of consciousness  YES  NO  DON'T KNOW

Seizures with passing urine or stool on self and /or foaming at the mouth

YES  NO  DON'T KNOW

Has he the participant had a seizure within the last 12 months?

YES  NO  DON'T KNOW

IF YES, in which month has the last seizure been experienced?

MONTH: \_\_  DON'T KNOW

What is the current frequency of the seizures?

Yearly (if less than 1 per month)

Monthly (if less than 4 per month)

Weekly (if less than 7 per week)

Daily (if more than 7 per week)

Specify number: \_\_\_\_\_ per \_\_\_\_\_

How many seizures did you have LAST WEEK?  Number \_\_\_\_  None  DON'T KNOW

Was the onset of seizures within the first year of life?

YES  NO  DON'T KNOW

IF the onset of the seizures was within the first year of life:

During the first 10 days of life

More than 10 days to 6 month

More than 6 month to 1 year

If the onset of seizures was after the age of one, at what age?

\_\_\_\_\_ years  
 DON'T KNOW

Of what type are the most frequent seizures?

Generalized seizures with loss of consciousness



- Atonic seizures (drop attacks)
- Absences
- Simple partial (focal) seizures (consciousness not lost)
- Complex partial (focal) seizures (decreased consciousness)
- Secondarily generalized partial seizures
- Others, specify: \_\_\_\_\_

**MEDICAL HISTORY**

Family history of nodding disease  YES  NO  DON'T KNOW  
 IF YES: Number of affected siblings with nodding syndrome \_\_\_\_\_

Family history of seizures  YES  NO  DON'T KNOW  
 IF YES, specify who these are (tick all that apply)  
 Siblings (brother/sister); No. of affected siblings \_\_\_\_\_  
 Father  Mother  Grandparent(s)

Family history of mental illness  YES  NO  DON'T KNOW

***Questions for the mother of the participant***

Did the pregnancy of the mother of the participant proceed normally?  
 YES  NO  DON'T KNOW

If NO, specify: \_\_\_\_\_

Mode of delivery for the affected child:  
 Spontaneous Vaginal Delivery  
 Assisted Vaginal Delivery  
 Caesarean section

Was the interviewed participant born at term (pregnancy had completed 9 months)?  
 YES  NO  DON'T KNOW

Did the interviewed participant cry immediately?  
 YES  NO  DON'T KNOW

What was the birth weight? \_\_\_\_\_ GRAMS  DON'T KNOW

***Psychomotor Development during Childhood:***

**Prior to onset of seizures**

Was the child growing normally prior to the onset of the seizures?  
 Yes  No  DON'T KNOW

IF NO, at what age did the abnormal growing appear? \_\_\_\_\_ Years

Did the child learn to do things like other children of his/her age prior to the onset of the seizures?  
 Yes  No  DON'T KNOW

IF NO, at what age did the learning difficulty start? \_\_\_\_\_ Year

Compared with other children of his/her age, did the child appear in any way mentally backward, dull or slow before the onset of the seizures?

Yes  No  DON'T KNOW

IF YES, at what age did it start? \_\_\_\_\_ Years

**Since the onset of seizures,**

Compared with other children of his/her age, did the child learned to do things like other children?

Normal  Delayed  Abnormal  
 Others, specify: \_\_\_\_\_

Compared with other children of his/her age, did the child appeared in any way mentally backward, dull or slow?

Normal  Delayed  Abnormal  
 Others, specify: \_\_\_\_\_

***Occurrence of severe disease in the past:***

Has the interviewed participant suffered from severe measles before the onset of epileptic seizures?

YES  NO  DON'T KNOW

Has the interviewed participant suffered from a severe form of malaria before the onset of epileptic seizures?

YES  NO  DON'T KNOW

Has the interviewed participant suffered from encephalitis/meningitis before the onset of epileptic seizures?

YES  NO  DON'T KNOW

Has the participant had a head injury with loss of consciousness before the onset of epileptic seizures?

YES  NO  DON'T KNOW

Has the participant had a prolonged post-traumatic coma before the onset of epileptic seizures?

YES  NO  DON'T KNOW

Has the patient presented febrile convulsions in the past?  YES  NO  DON'T KNOW

Was the onset of epilepsy following another illness?

YES  NO  DON'T KNOW

If YES, specify the illness:

\_\_\_\_\_

Has the participant a history of excessive alcohol consumption?

YES  NO  DON'T KNOW  Not applicable\*

Has the participant a history of drugs abuse?

YES  NO  DON'T KNOW  Not applicable\*

## GENERAL EXAMINATION

BODY WEIGHT (kg): \_\_\_\_\_ . \_\_\_\_kg

HEIGHT (cm): \_\_\_\_\_cm

How is the general condition of the interviewed participant?

GOOD  CORRECT  POOR

Thoracic abnormalities  YES  NO

If yes specify \_\_\_\_\_

Facial abnormalities  YES  NO

If yes specify \_\_\_\_\_

Does the adolescent (> 16years old) /adult looks like a child?  YES  NO

If yes, external signs of sexual development conform to age:

YES  NO  EXAMINATION DECLINED

If NO, specify:

girls:  breast not developed  
girls and boys:  no pubic hair

Ophthalmology  NORMAL  ABNORMAL VISION  
 BLIND, BOTH EYES AFFECTED

Dermatology  NORMAL  ABNORMAL

Burn scars  YES  NO

Itching  YES  NO

Papular eruption  YES  NO

Depigmented lesions (leopard skin)  YES  NO

Suspected onchocerciasis nodules  YES  NO

## NEUROLOGICAL EXAMINATION

Is the participant alert?  YES  NO

Fully oriented in place/time/person  YES  NO

Is the participant's cognitive development comparable with peers?

YES  NO

Normal vision  YES  NO

Normal hearing  YES  NO

Normal eye movements?  YES  NO

Generalised muscle wasting  YES  NO

Paresis  YES  NO

if YES specify\_\_\_\_\_

Contractures  YES  NO

Is the participant walking normally?  YES  NO

IF NO, specify

Ataxic (wide base) gait

Waddling gait (like a duck)

Spastic gait –with tip toe walking

Hemiplegic – with one sided weakness

Other, specify\_\_\_\_\_

### **Psychiatric symptoms**

Does the participant has hallucinations, i.e. sees, hears, smells, feels or tastes things that don't exist?

YES  NO

Does the participant have delusions, i.e. strongly held false belief by participant despite superior evidence against belief?  YES  NO

Does the participant show aggressive episodes?

YES  NO

Have you felt very sad (irritable) for a period of more than two weeks?  YES

NO

Have you experienced loss of interest and pleasure in almost all activities for a period of more than two weeks?  YES  NO

In the past month, have you been having strong memories / dreams of something bad that happened to you or your loved one?  YES  NO

Does to participant suffer from another neuro-psychiatric / psychological problem?

YES  NO  DON'T KNOW

IF YES for any of the questions about psychiatric symptoms, refer to neuro-psychiatrist:

**Diagnosis neuro-psychiatrist** (using the Acholi translated version of the MINI, a diagnostic tool for psychiatric disorders)

- Major Depression
- Post-traumatic Stress Syndrome
- Generalized Anxiety
- Pervasive Development Disorder

**Physical / Functional Indices**

*Modified Rankin Scale: Please mark the most accurate description of the current functional state of the child, as observed during the evaluation*

| Score                     | Description                                                                                                                 |
|---------------------------|-----------------------------------------------------------------------------------------------------------------------------|
| 0                         | No symptoms at all                                                                                                          |
| 1                         | No significant disability despite symptoms; able to carry out all usual duties and activities                               |
| 2                         | Slight disability; unable to carry out all previous activities, but able to look after own affairs without assistance       |
| 3                         | Moderate disability; requiring some help, but able to walk without assistance                                               |
| 4                         | Moderately severe disability; unable to walk without assistance and unable to attend to own bodily needs without assistance |
| 5                         | Severe disability; bedridden, incontinent and requiring constant nursing care and attention                                 |
| 6                         | Dead                                                                                                                        |
| <b>SCORE (0-6): _____</b> |                                                                                                                             |

**CASE CLASSIFICATION**

- Head Nodding Syndrome
- Head Nodding Syndrome plus
- Other form of Epilepsy
- Other diagnosis

If other diagnosis:

- Recurrent febrile convulsions
- Dizziness / syncope
- Paroxysmal vertigo
- Severe anaemia
- Mental retardation without epilepsy
- Psychiatric illness without epilepsy
- Classic migraine
- Other, specify \_\_\_\_\_

**TREATMENT**

What is or was the type of seizure medication taken by the participant?

- No treatment       DON'T KNOW  
 Traditional       anti-epileptic drug  
 Mixed

*If anti-epileptic drug treatment:* Which substance is taken by the participant (additionally you may check patient's treatment record)?

- Phenytoin       YES     NO  
Sodium valproate       YES     NO  
Phenobarbital       YES     NO  
Carbamazepin       YES     NO  
Diazepam       YES     NO  
Ethosuximide       YES     NO  
Other anti-epileptic treatment       YES     NO

If YES, specify: \_\_\_\_\_

*Compliance:* Is the participant taking the anti-epileptic drug treatment regularly?

- YES     NO

If NO, why?

- Side effects  
 (Temporary) non-availability of medication  
 Lack of financial means to access medication  
 DON'T KNOW  
 Other, specify \_\_\_\_\_

If the person took anti-epileptic treatment what was the response to the treatment?

- No effect on the seizures  
 Decrease of the frequency of seizures when the drug was taken  
 No more seizures since drugs were taken  
 DON'T KNOW

## **IVERMECTIN USE**

Has the participant ever received ivermectin?     YES     NO     DON'T KNOW

NOT APPLICABLE (according to exclusion criteria, as follows):

1) age <5 years at the moment of CDTi; 2) pregnancy; 3) Breast feeding < 7 days; 4) acute severe disease:      1    2    3    4

IF YES: Has the participant taken ivermectin during the last CDTi in 2016?

- YES     NO     DON'T KNOW

How many times per year?

- ONCE     TWICE     DON'T KNOW

IF NOT taken in 2016, why?  
refused

- no distribution     absent during the CDTi

- afraid of secondary effects  
 pregnancy  
 breastfeeding an infant younger than 7days  
 because I was asked to NOT take it  
 age <5 years at the time of CDTi

- severe acute disease at the time of CDTi
- other, specify \_\_\_\_\_

IF TAKEN in 2016, why?

- It is recommended to be taken to prevent river blindness
- to decrease itching
- other, specify \_\_\_\_\_

Was Ivermectin/Mectizan distributed in another way than orally?

- YES
- NO
- DON'T KNOW

Picture or video taken:  YES  NO

**Action Taken by reporting officer:** referred for treatment  YES  NO

If yes, where \_\_\_\_\_

Signature of the interviewer \_\_\_\_\_
